# Supplementary material
Source: publisher figshare collection journal article supplement (https://sage.figshare.com/ndownloader/files/18169367)
Supplement: Supplementary file 1 [file 18169367]

## **Highlights**

In the international environment, although some results address the ethnic issues related to the LGBT group, the insufficient number of studies produced every year is noticeable, amplifying this type of marginalization in the health field

The scarcity of studies in this area suggested lack of knowledge on the health profiles of the LGBT afro population. The individualized attention proved to be insufficient and reveals the need for training health professionals aware of the aspects and health care for this population, with a view to implementing integral health policies that already exist.
